# Supplementary material
Source: Springer Nature journal article supplement (https://www.springermedizin.de/resource/supplementary/13058_2012_3209_MOESM1_ESM.pdf/9703496)
Supplement: MOESM1 [file 9703496]

Pre-randomization

Biopsy

Randomization

121 patients  
randomized  
1:1:1

Extended ( $n = 18$ )

- Insufficient tumor tissue to allow paired analysis ( $n = 13$ )
- Treated to surgery period too long ( $n = 3$ )
- Consent withdrawal ( $n = 1$ )
- ER-negative status ( $n = 1$ )

Day 1

Fulvestrant 500 mg on Day 1  
+ anastrozole placebo  
for 14-21 days  
( $n = 35$ )

Fulvestrant 500 mg on Day 1  
+ anastrozole 1 mg orally  
for 14-21 days  
( $n = 31$ )

Anastrozole 1 mg orally  
for 14-21 days  
+ fulvestrant placebo on Day 1  
( $n = 37$ )

Days 15-22

Surgery  
( $n = 35$ )

Surgery  
( $n = 31$ )

Surgery  
( $n = 37$ )
